# Supplementary material for: Genome-wide identification of DNA methylation QTLs in whole blood highlights pathways for cardiovascular disease
Source: PubMed Central journal article supplement (PMC6753136; doi:10.1038/s41467-019-12228-z), 2019-09-19
Supplement: 41467_2019_12228_MOESM10_ESM.pdf [file 41467_2019_12228_MOESM10_ESM.pdf]

**Title:** Supplementary Data 1:

**Description:** CpGs with  $h^2 > 0.1$ .

**Title:** Supplementary Data 2:

**Description:** CpGs with household effects  $> 0.1$ .

**Title:** Supplementary Data 3:

**Description:** Mendelian randomization results of causal CpGs for CVD and CVD risk factors.

**Title:** Supplementary Data 4:

**Description:** Pathway analysis of cis-meQTLs for 92 CVD related CpGs by FUMA.

**Title:** Supplementary Data 5:

**Description:** Putatively causal gene expression traits for CVD and CVD risk factors using FHS blood eQTLs.

**Title:** Supplementary Data 6:

**Description:** trans-meQTL hotspots.

**Title:** Supplementary Data 7:

**Description:** Linking GWAS p values with peak cis-meQTLs for each CVD causal CpG.
